# Supplementary material for: Donor financing of human resources for health, 1990–2016: an examination of trends, sources of funds, and recipients
Source: Springer Nature journal article supplement (doi:10.1186/s12992-018-0416-z), 2018-10-17
Supplement: MOESM1 [file 16206876]

## ANNEX

## Keywords used to identify HRH related projects

global hrh\_level " INFRASTRUCTUR" " MEDICAL EQUIPMENT" " SURGICAL EQUIPMENT" " HOSPITAL EQUIPMENT" " HOSPITAL EQMT " " BUILDINGS " " HEALTH FACILIT" " CONSTRUCT" " MEDICAL SCHOOL" "CENTERS OF EXCELLENCE" " TRAINING " " CAPACITY " " SKILLED WORKER" " HEALTH WORKER" " SKILLED STAFF " " HEALTH PROFESSIONAL" " HUMAN RESOURCE" " HUMAN CAPITAL " " IMPROVED CAPACITIES " " MEDICAL WORKER" " HEALTH CARE PERSONNEL " " WORKFORCE " " ADMINISTRATIVE " " MEDICAL EDUCATION " " HEALTH EDUCATION " " CONTINUING EDUCATION " " HEALTH MANAGEMENT" " MANAGEMENT AND COORDINATION " " ADMINISTRATIVE MANAGEMENT " " MANAGEMENT AND ADMINISTRATION " " STRENGTHENING INSTITUTIONAL CAPACIT" "NURSE" "DOCTOR" "PHYSICIAN" "MIDWIFE" "MIDWIVES" "MEDICAL LABORATORY SCIENTIST" "SURGEON" "SPECIALIST" "PHARMACIST" "COMMUNITY HEALTH WORKER" "EMPLOYMENT" "HEALTH LABOR" "LABOR MARKET" "PERSONNEL" "MEDICAL PRACTITIONER" "DENTAL PRACTITIONER" "TASK SHIFTING"

## Program areas

global train\_level "TRAINING" " TRAIN " "TRNG" "CAPACITY" "CAPACITIES" "CAPACITE" "ENTRAINEMENT" "LEARNING" "INTERNSHIP" " FORMATION" "WORKSHOP" "COURSES"

global educ\_level " EDUC" "SCHOLARSHIP" "BOURSES"

global mgmt\_level " ADMIN" "MANAGEMENT" "LEADERSHIP" "POLICY" "POLICIES"

global pers\_level "PERSONNEL DEVELOPMENT" "DVPT" "DEVPT"

global staff\_level "FELLOW" "SALAR" "VOLUNTEER" "STAFFING" "PROVISION OF SURGICAL TEAM" "CONSULTANCY" "SECONDMENT" "WORK PERMIT" "TA SUPPORT" "TECHNICAL ASSISTANCE"

global budget\_level "GENERAL BUDGET SUPPORT"

global infra\_level " INFRASTRUCTUR" " MEDICAL EQUIPMENT" " SURGICAL EQUIPMENT" " HOSPITAL EQUIPMENT" " HOSPITAL EQMT " " BUILDINGS " " HEALTH FACILIT" " CONSTRUCT" " MEDICAL SCHOOL" "CENTERS OF EXCELLENCE"

Figure S1: Development assistance for human resources for health by type of expense, 1990-2016

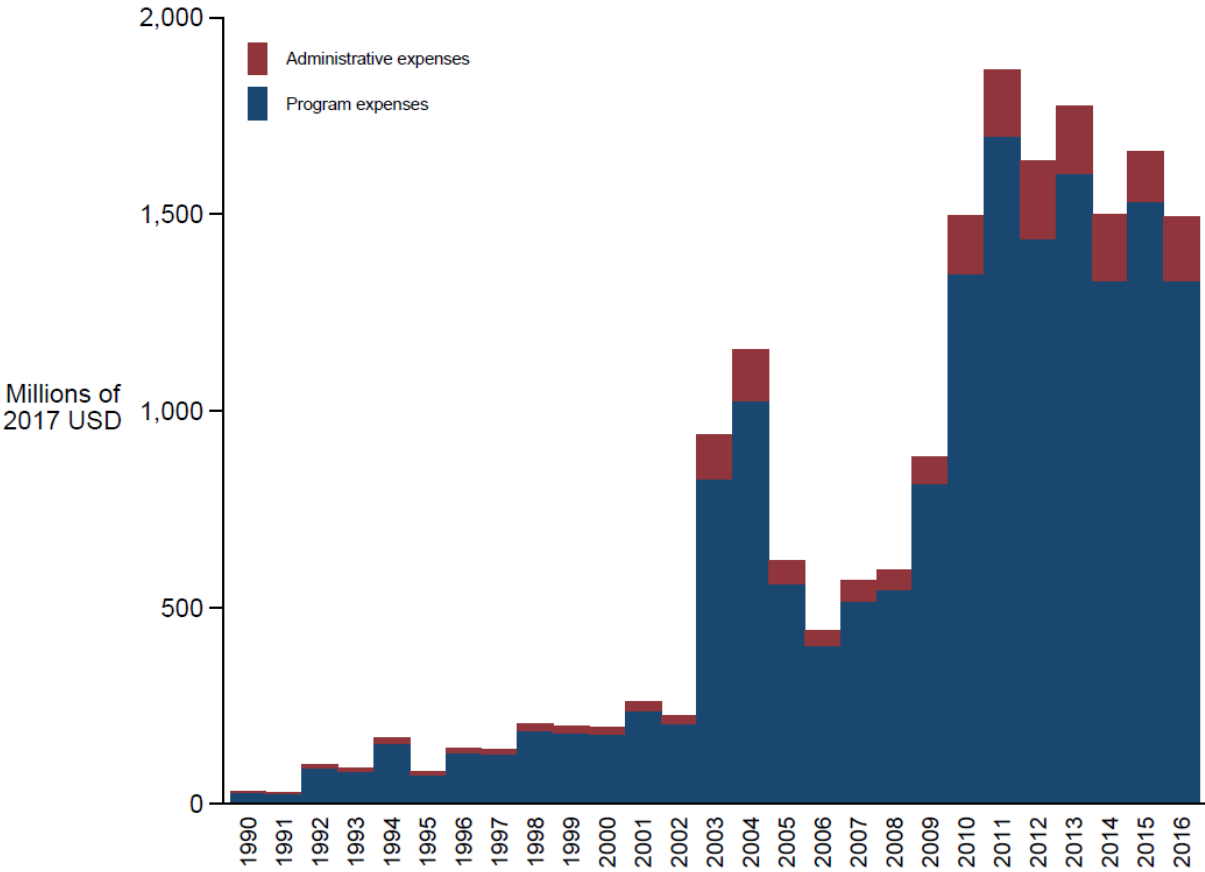

Note: Administrative expenses is calculated by dividing operational expense by the amount of grant disbursed.

Sources: Authors’ analysis of data from the Institute for Health Metrics and Evaluation 2017 development assistance for health database.
